# Supplementary material for: The four and a half LIM domains 2 (FHL2) regulates ovarian granulosa cell tumor progression via controlling AKT1 transcription
Source: PubMed Central journal article supplement (PMC4973349; doi:10.1038/cddis.2016.207), 2016-07-14
Supplement: cddis2016207x1.pdf [file cddis2016207x1.pdf]

## Supplementary Information

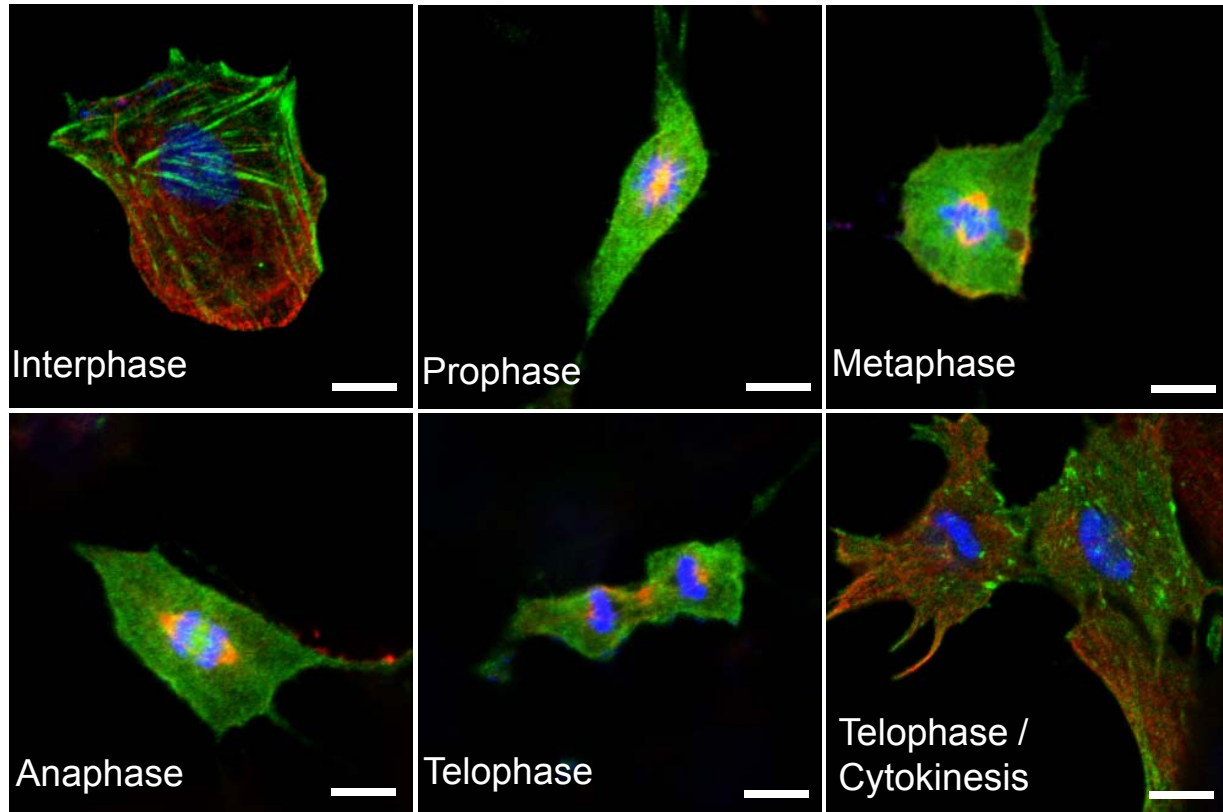

**Supplementary figure S1. Cell cycle stage-dependent distribution of FHL2 protein in KGN cells.** FHL2 protein expression and localization were determined by fluorescent immunohistochemistry. Images were captured with a Laser Scanning Confocal Microscope. FHL2 immunosignal was presented as green and  $\beta$ -tubulin was presented as red color. Nuclei were stained with DAPI (blue). Scale bar: 10 $\mu$ m.
