# Supplementary material for: The four and a half LIM domains 2 (FHL2) regulates ovarian granulosa cell tumor progression via controlling AKT1 transcription
Source: PubMed Central journal article supplement (PMC4973349; doi:10.1038/cddis.2016.207), 2016-07-14
Supplement: cddis2016207x2.pdf [file cddis2016207x2.pdf]

# Supplementary Information

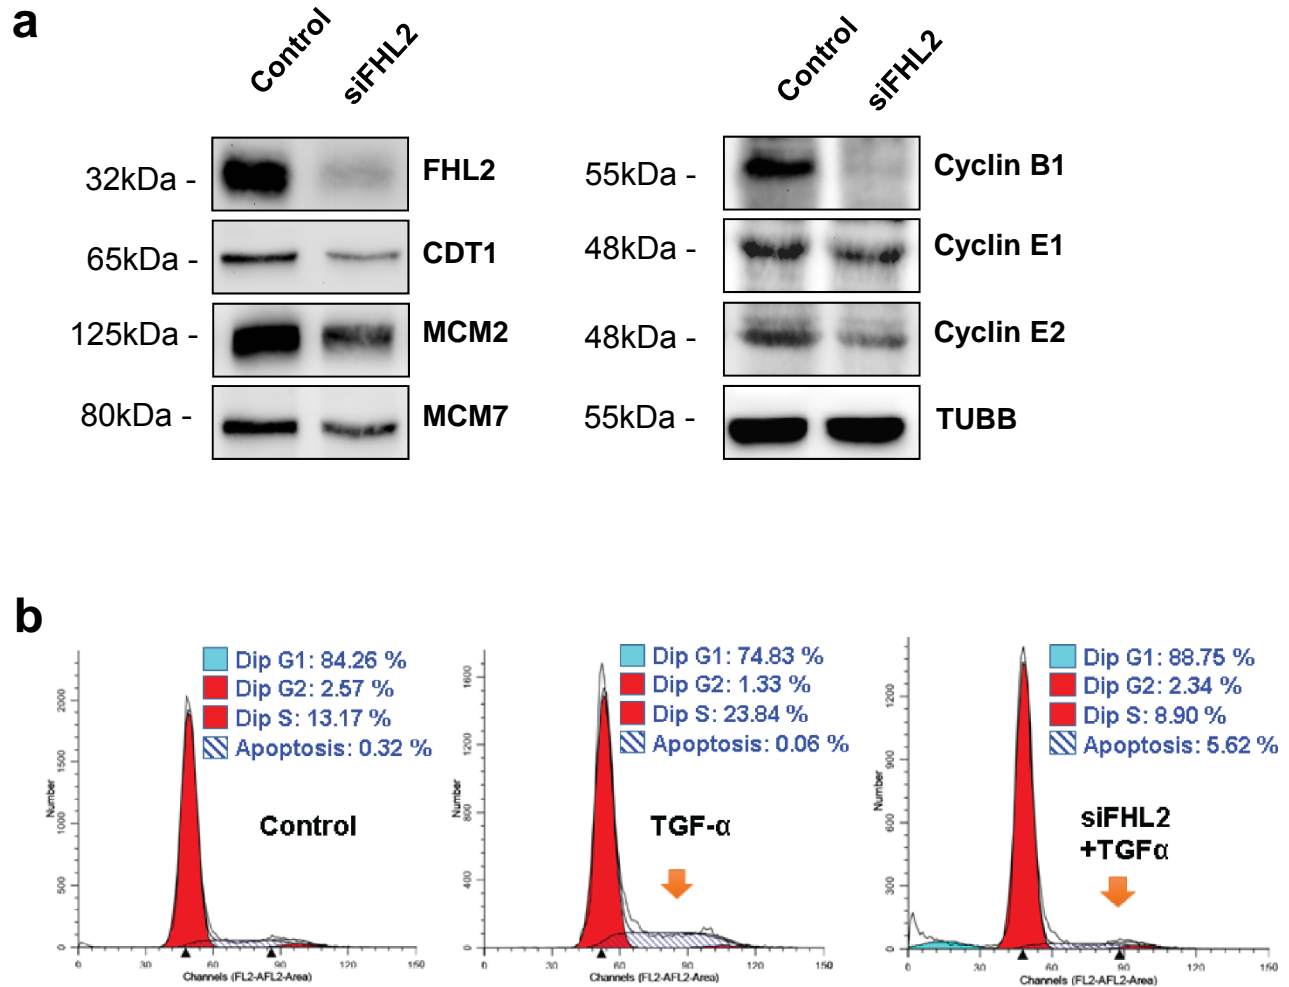

**Supplementary figure S2. Effect of FHL2 on GCT cell growth.** a) Knockdown of FHL2 suppressed expression of pro-proliferation factors. Protein levels were determined by Western blot.  $\beta$ -tubulin (TUBB) was used as a protein loading control. b) Knockdown of FHL2 in KGN cells eliminated TGF $\alpha$ -induced increase in cells in the S phase.
