# Supplementary material for: The four and a half LIM domains 2 (FHL2) regulates ovarian granulosa cell tumor progression via controlling AKT1 transcription
Source: PubMed Central journal article supplement (PMC4973349; doi:10.1038/cddis.2016.207), 2016-07-14
Supplement: cddis2016207x4.pdf [file cddis2016207x4.pdf]

## Supplementary Information

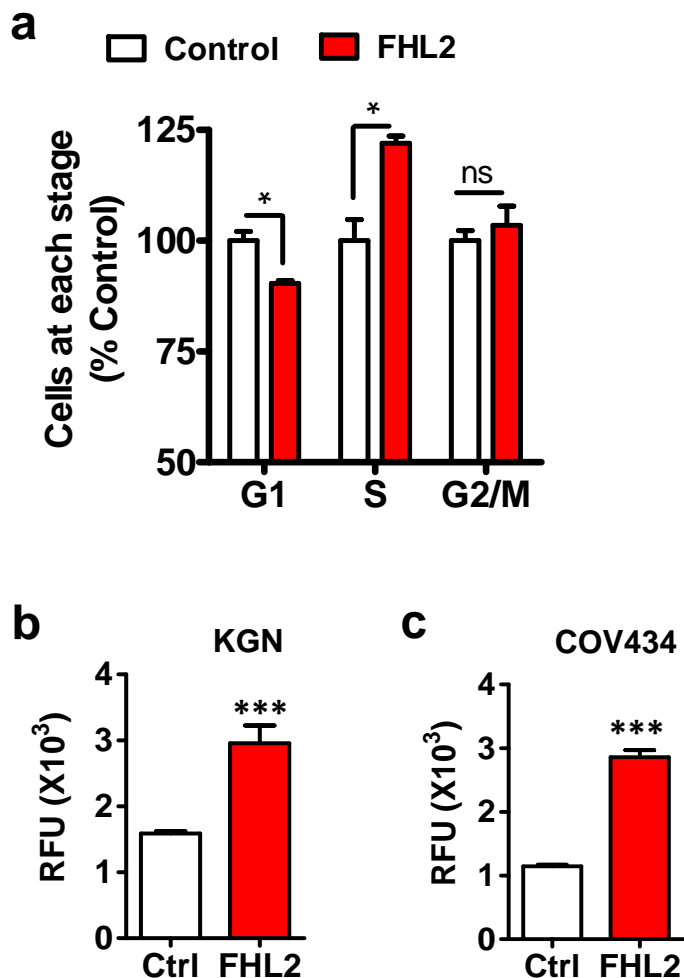

**Supplementary figure S4. Overexpression of FHL2 in KGN cells promotes cell growth and migration.** **a)** Overexpression of FHL2 in KGN cells promotes cell cycle progression. Each bar represents mean  $\pm$  SEM of three independent assays. \*:  $P < 0.05$  compared with control; ns: no significant difference compared with control. **b)** Fluorescence-based quantitative soft agar assay showing the relative colony numbers (indicated by RFU) in KGN cells transfected with empty vector (Ctrl) or FHL2-expressing vector (FHL2). **c)** Fluorescence-based quantitative soft agar assay showing the relative colony numbers (indicated by RFU) in COV434 cells transfected with empty vector (Ctrl) or FHL2-expressing vector (FHL2). Each bar represents mean  $\pm$  SEM of five independent repeats. \*\*\*:  $p < 0.001$  compared to control group (Ctrl).
