# Supplementary material for: The four and a half LIM domains 2 (FHL2) regulates ovarian granulosa cell tumor progression via controlling AKT1 transcription
Source: PubMed Central journal article supplement (PMC4973349; doi:10.1038/cddis.2016.207), 2016-07-14
Supplement: cddis2016207x5.pdf [file cddis2016207x5.pdf]

## Supplementary Information

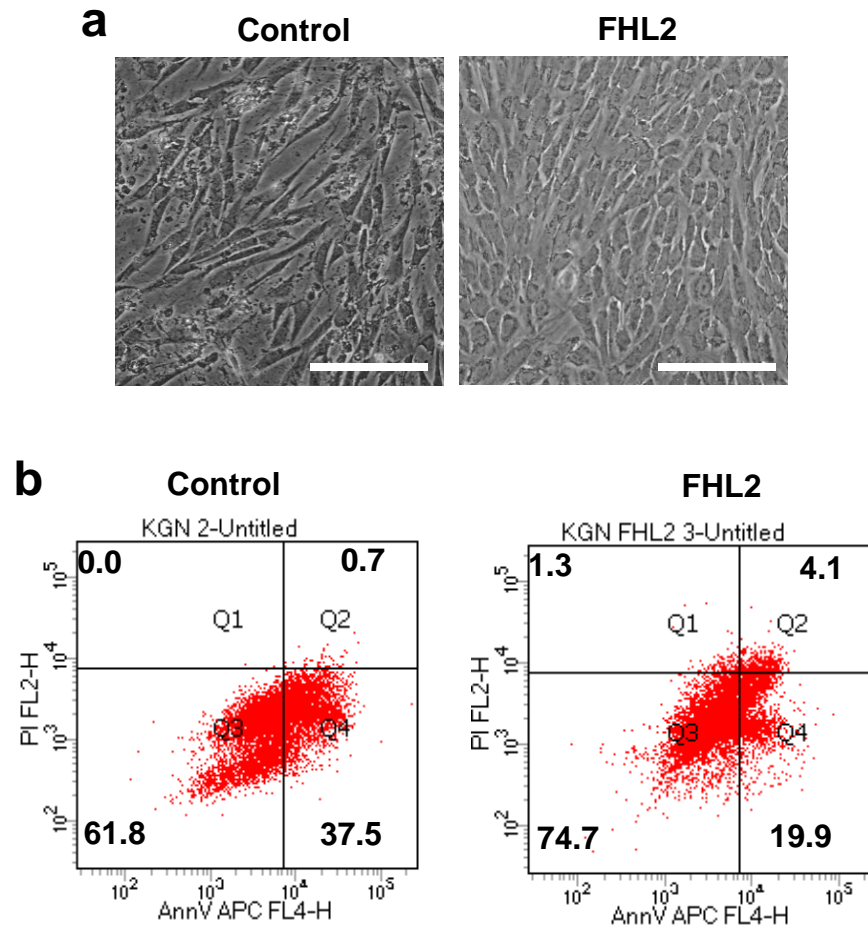

**Supplementary figure S5. Ectopic expression of FHL2 in GCT cells promote their growth and viability.** **a**) Representative images showing morphology of KGN cells transfected with empty vector (control) or FHL2-expressing vector (FHL2). Cells were cultured in serum-free medium for 21 days before morphological analysis. Scale bar: 200 $\mu$ m. **b**) Viability of KGN cells transfected with empty vector (control) or FHL2-expressing vector (FHL2). Cells were starved (in serum-free medium) for 21 days and stained with the Annexin V-APC/PI dual staining kit before measuring with flow cytometry. All Experiments were repeated three times and the representative images were shown.
