# Supplementary material for: The four and a half LIM domains 2 (FHL2) regulates ovarian granulosa cell tumor progression via controlling AKT1 transcription
Source: PubMed Central journal article supplement (PMC4973349; doi:10.1038/cddis.2016.207), 2016-07-14
Supplement: cddis2016207x6.pdf [file cddis2016207x6.pdf]

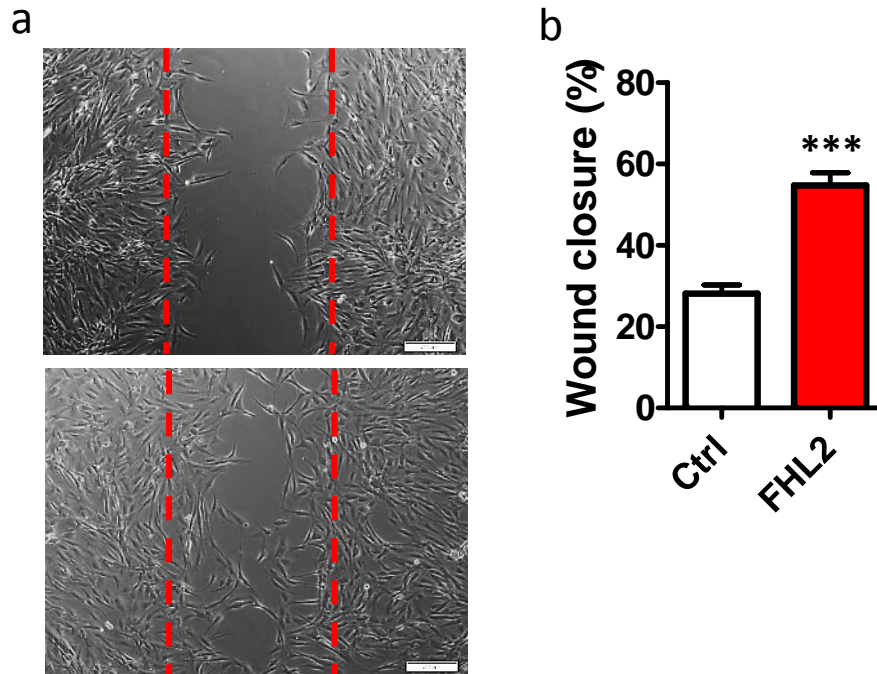

**Supplementary figure S6. Ectopic expression of FHL2 stimulates GCT cell migration.** **a)** Wound healing assay showing the mobility of KGN cells transfected with empty vector (Ctrl) or FHL2-expressing vector (FHL2). The initial wound edge is highlighted by red dashed lines. cells were incubated for 18h before measuring the wound area. **b)** Quantitative result showing mobility change of KGN cells transfected with empty control vector (Ctrl) or FHL2-expressing vector (FHL2). Each bar represents mean  $\pm$  SEM of five repeats. \*\*\*:  $P < 0.001$  compared with control group (Ctrl).
