# Supplementary material for: The four and a half LIM domains 2 (FHL2) regulates ovarian granulosa cell tumor progression via controlling AKT1 transcription
Source: PubMed Central journal article supplement (PMC4973349; doi:10.1038/cddis.2016.207), 2016-07-14
Supplement: cddis2016207x7.pdf [file cddis2016207x7.pdf]

## Supplementary Information

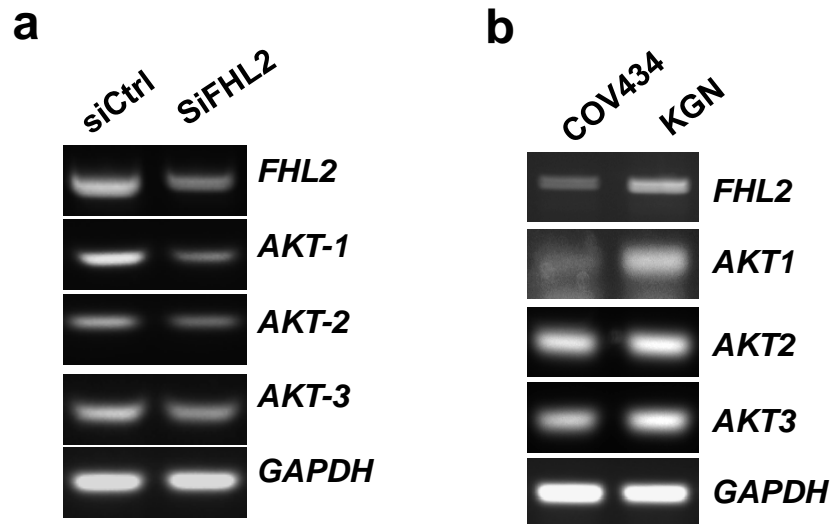

**Supplementary figure S7. RT-PCR results showing effects of *FHL2* on *AKT* expression in KGN and COV434 cells. a) *FHL2* and *AKT* mRNA levels in KGN cells transfected with non-targeting control siRNA (siCtrl) or *FHL2* siRNA (siFHL2). Knockdown of *FHL2* suppressed expression of *AKT1*, but not *AKT2* and *AKT3*. b) *FHL2* and *AKT* mRNA levels in KGN and COV434 cells. *FHL2* and *AKT* are differentially expressed in *FHL2* and COV434 cell lines. Experiments are independently repeated for three times and the representative images are presented.**
