# Supplementary material for: The four and a half LIM domains 2 (FHL2) regulates ovarian granulosa cell tumor progression via controlling AKT1 transcription
Source: PubMed Central journal article supplement (PMC4973349; doi:10.1038/cddis.2016.207), 2016-07-14
Supplement: cddis2016207x8.pdf [file cddis2016207x8.pdf]

## Supplementary Information

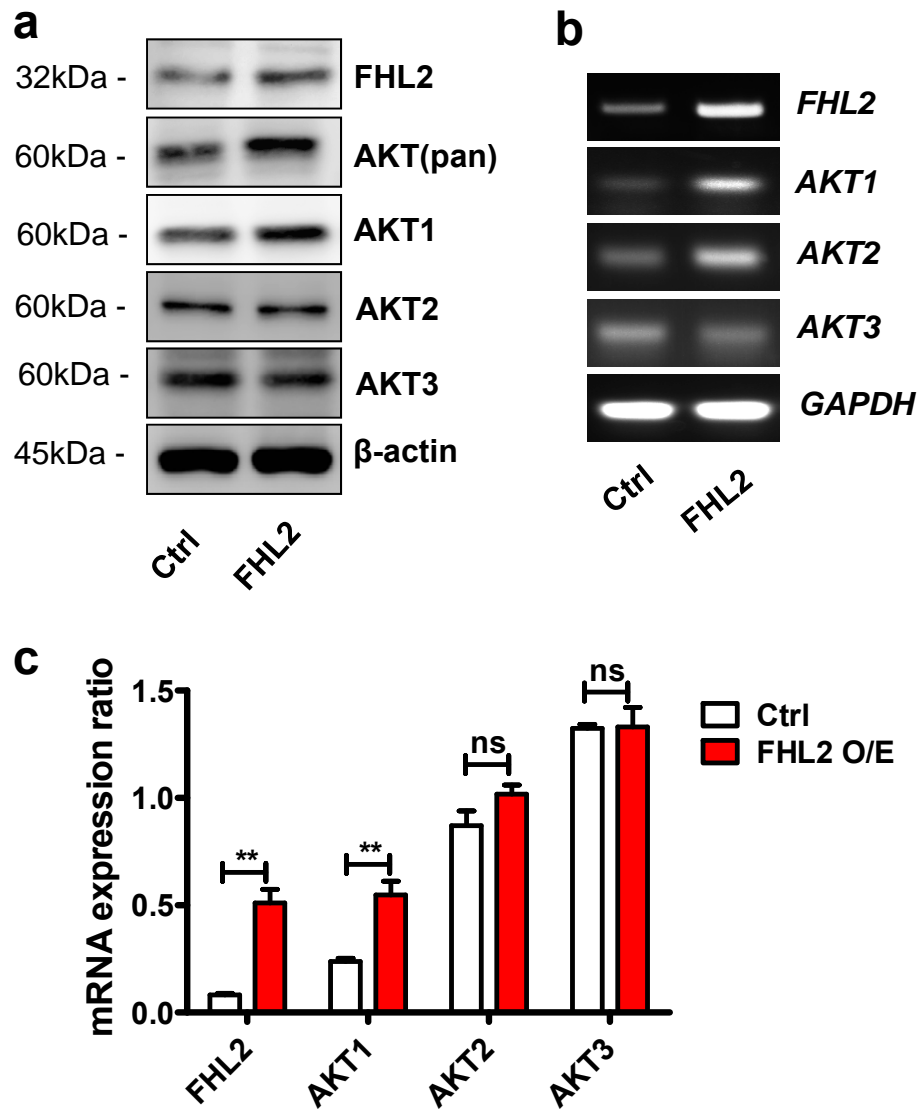

### Supplementary figure S8. Overexpression of FHL2 induce AKT1 expression.

**a)** Western blot analysis showing that ectopic expression of FHL2 in COV434 cells increased pan-AKT and AKT1 protein levels, but has no effect on protein levels of AKT2 and AKT3. **b)** RT-PCR results showing that ectopic expression of FHL2 in COV434 cells induced increase in the transcription of *AKT1* and *AKT2*, but not *AKT3*. **c)** Quantitative result of figure 5d showing that overexpression of FHL2 induced significant increase in *AKT1*, but not *AKT2* and *AKT3* mRNA in GCT tumor xenografts. Quantitative data were normalized to GAPDH. Bars represents mean  $\pm$  SEM of four repeats. \*\*:  $P < 0.01$  compared to control group (Ctrl). ns: No significant difference.
