# Supplementary material for: The four and a half LIM domains 2 (FHL2) regulates ovarian granulosa cell tumor progression via controlling AKT1 transcription
Source: PubMed Central journal article supplement (PMC4973349; doi:10.1038/cddis.2016.207), 2016-07-14
Supplement: cddis2016207x9.pdf [file cddis2016207x9.pdf]

## Supplementary Information

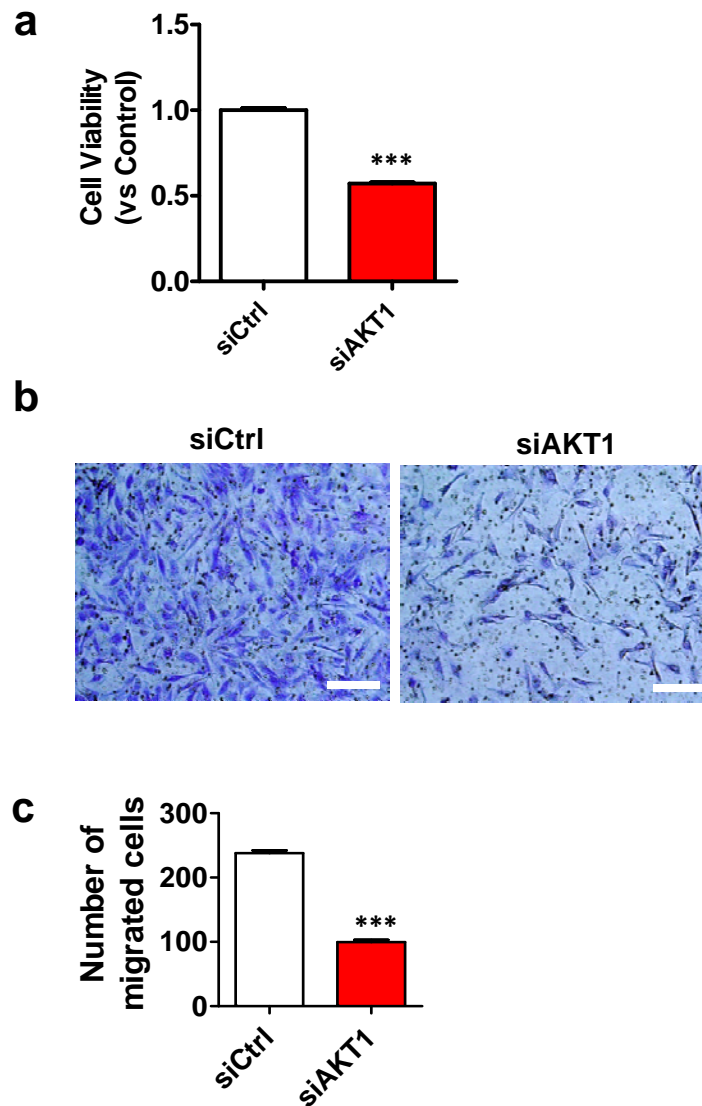

**Supplementary figure S9. Knockdown of AKT1 and FHL2 in KGN cells results in similar phenotypes.** **a)** Change in cell viability in KGN cells transfected with non-targeting control siRNA (siCtrl) or AKT1 siRNA (siAKT1). Cell viability was determined by MTT assay. **b)** Representative images showing migration of KGN cells transfected with non-targeting control siRNA (siCtrl) and AKT1 siRNA (siAKT1). Cell migration was determined using a Transwell migration assay. Scale bar: 200  $\mu$ m. **c)** Quantitative result of **b)**. Migrated cells were counted manually under a microscope. Each bar represents mean  $\pm$  SEM (n=5). \*\*\*:  $P < 0.001$ , compared with control (siCtrl).
