# Supplementary material for: The four and a half LIM domains 2 (FHL2) regulates ovarian granulosa cell tumor progression via controlling AKT1 transcription
Source: PubMed Central journal article supplement (PMC4973349; doi:10.1038/cddis.2016.207), 2016-07-14
Supplement: cddis2016207x10.pdf [file cddis2016207x10.pdf]

## Supplementary Information

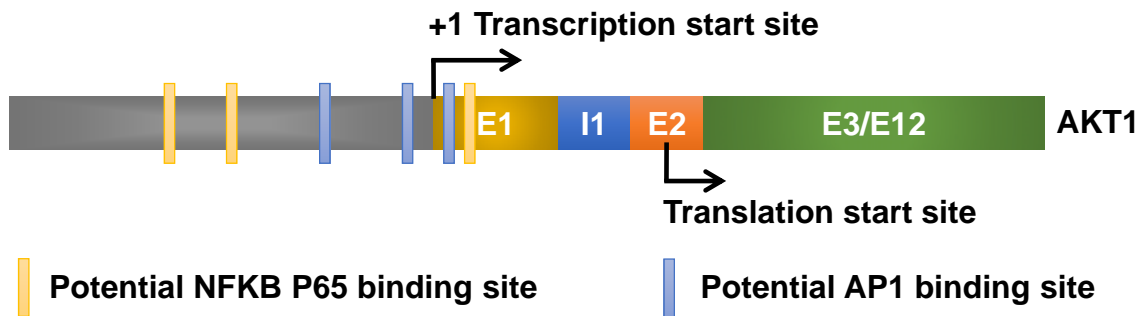

**Supplementary figure S10.** NF $\kappa$ B and AP-1 transcription factors have two binding sites in *AKT1* gene promoter region. In silico analysis of *AKT1* gene with PROMO software ([http://alggen.lsi.upc.es/cgi-bin/promo\\_v3/promo/promoinit.cgi?dirDB=TF\\_8.3](http://alggen.lsi.upc.es/cgi-bin/promo_v3/promo/promoinit.cgi?dirDB=TF_8.3)) shows that both NF $\kappa$ B and AP-1 transcription factors have two binding sites in the promoter region of *AKT1* gene. Moreover, both NF $\kappa$ B and AP-1 transcription factors have another binding site in the exon 1 (E1) region of *AKT1* gene..
